# Supplementary material for: Fabrication and electrochemical performances of hierarchical porous Ni(OH)2 nanoflakes anchored on graphene sheets
Source: Royal Society of Chemistry journal article supplement (doi:10.1039/c2jm30221g), 2012-01-01
Supplement: c2jm30221g.pdf [file c2jm30221g.pdf]

## Electronic Supplementary Information

### **Fabrication and electrochemical performances of hierarchical porous Ni(OH)<sub>2</sub> nanoflakes anchored on graphene sheets**

Jun Yan,<sup>a</sup> Wei Sun,<sup>a</sup> Tong Wei,<sup>a</sup> Qiang Zhang,<sup>b</sup> Zhuangjun Fan\*<sup>a</sup> and Fei Wei<sup>b</sup>

<sup>a</sup> *Key Laboratory of Superlight Materials and Surface Technology, Ministry of Education College of Material Science and Chemical Engineering, Harbin Engineering University, Harbin 150001, China. E-mail: fanzhj666@163.com*

<sup>b</sup> *Beijing Key Laboratory of Green Chemical Reaction Engineering and Technology, Department of Chemical Engineering, Tsinghua University, Beijing 100084, China*

Fig. S1.

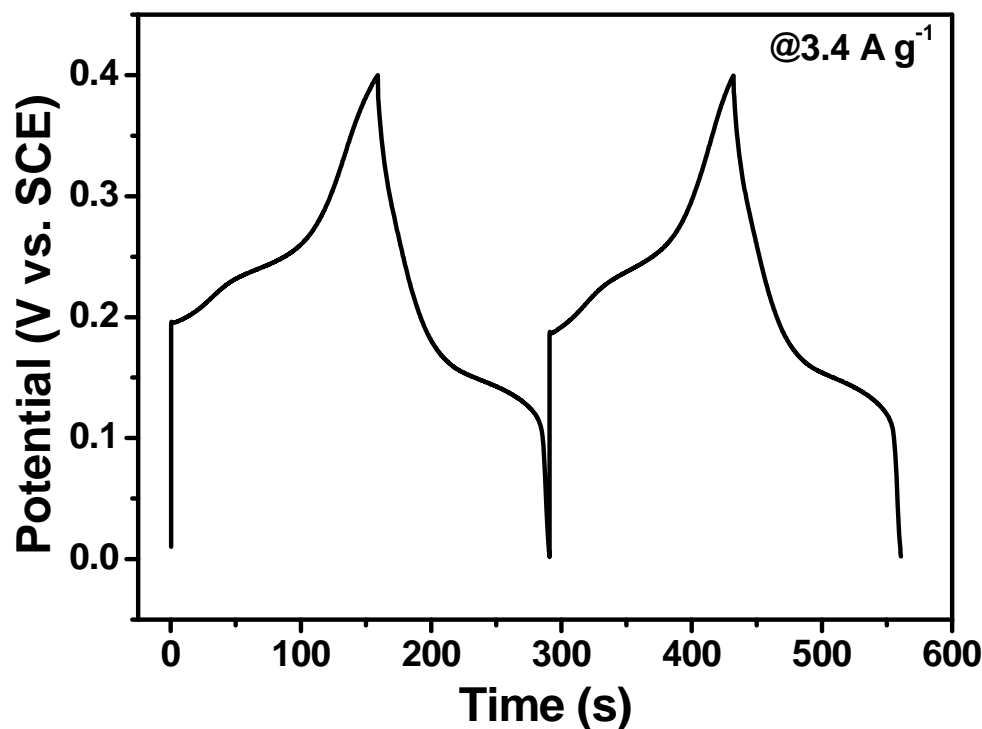

Fig. S1. Galvanostatic charge/discharge curve of the graphene/Ni(OH)<sub>2</sub> composite at a current density of 3.4 A g<sup>-1</sup>.

Fig. S1 shows the galvanostatic charge/discharge curves of the graphene/Ni(OH)<sub>2</sub> composite measured at a current density of 3.4 A g<sup>-1</sup> within the potential window of -0.1-0.45 V (vs. SCE). The shapes of the charge/discharge curves do not display the characteristic of a pure electric double layer capacitor, but mainly pseudocapacitance, which corresponds with the results of the CV tests as shown in Fig. 6b. Specific capacitance could also be calculated from the galvanostatic charge and discharge curves using the following formula:  $C = i \frac{\Delta t}{m \Delta V}$ , where  $I$  is charge and discharge current,  $\Delta t$  is the time for a full charge or discharge,  $m$  indicates the mass of the active

Supplementary Material (ESI) for Journal of Materials Chemistry  
This journal is © The Royal Society of Chemistry 2011

material in the electrode, and  $\Delta V$  represents the potential change after a full charge or discharge. The calculated specific capacitance is about  $1476 \text{ F g}^{-1}$  for graphene/ $\text{Ni}(\text{OH})_2$  electrode at a charge/discharge current density of  $3.4 \text{ A g}^{-1}$ .
